# Supplementary material for: Global diversity and biogeography of potential phytopathogenic fungi in a changing world
Source: PubMed Central journal article supplement (PMC10576792; doi:10.1038/s41467-023-42142-4), 2023-10-14
Supplement: 41467_2023_42142_MOESM2_ESM.pdf [file 41467_2023_42142_MOESM2_ESM.pdf]

## **Description of Additional Supplementary Files**

Supplementary Data 1: Top ten abundant and frequent (relative) potential phytopathogenic fungal genera in different continents/oceanic island regions.

Supplementary Data 2: Top ten abundant and frequent (relative) potential phytopathogenic fungal genera in different land cover types.

Supplementary Data 3: Top ten abundant and frequent (relative) potential phytopathogenic fungal genera in different habitats.
